# Supplementary material for: Cognitive behavioural treatment for women who have menopausal symptoms after breast cancer treatment (MENOS 1): a randomised controlled trial
Source: PubMed Central journal article supplement (PMC3314999; doi:10.1016/s1470-2045(11)70364-3), 2012-03
Supplement: mmc1.pdf [file mmc1.pdf]

## **Supplementary appendix**

This appendix formed part of the original submission and has been peer reviewed. We post it as supplied by the authors.

Supplement to: Mann E, Smith MJ, Hellier J, et al. Cognitive behavioural treatment for women who have menopausal symptoms after breast cancer treatment (MENOS 1): a randomised controlled trial. *Lancet Oncol* 2012; published online Feb 15. DOI:10.1016/S1470-2045(11)70364-3.

## Web Appendix

Figure 1: Unadjusted means and confidence intervals for weekly frequency of hot flushes at baseline, 9 and 26 weeks post-randomisation

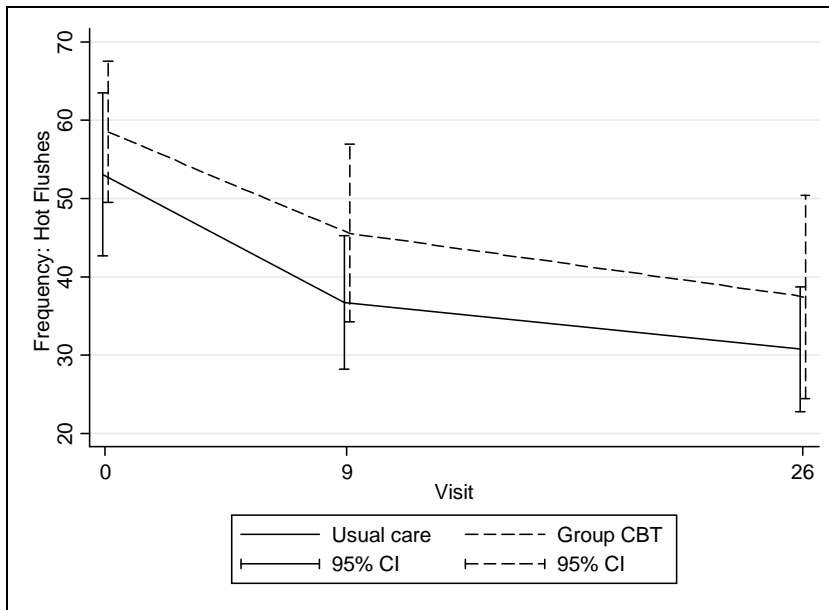

Figure 2: Unadjusted means and confidence intervals for weekly frequency of night sweats at baseline, 9 and 26 weeks post-randomisation

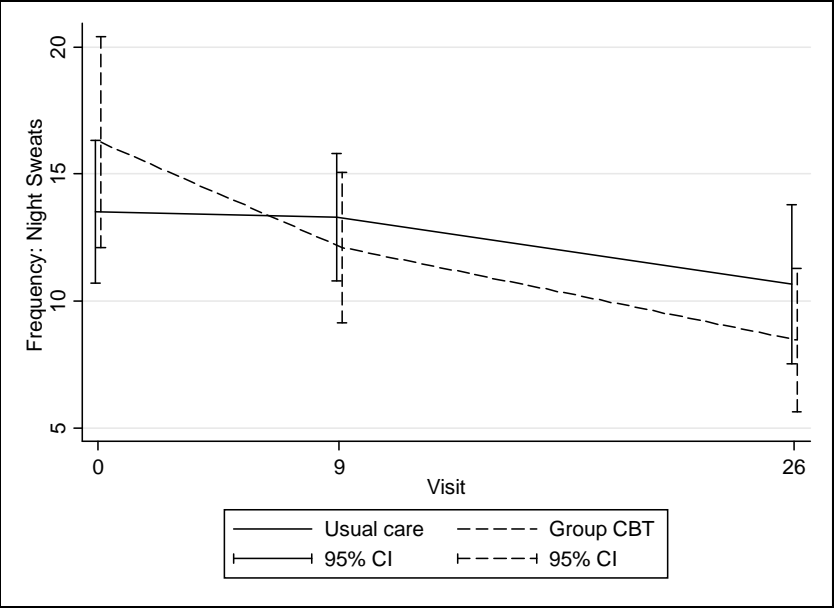

Figure 3: Unadjusted means and confidence intervals for WHQ depressed mood at baseline, 9 and 26 weeks post-randomisation

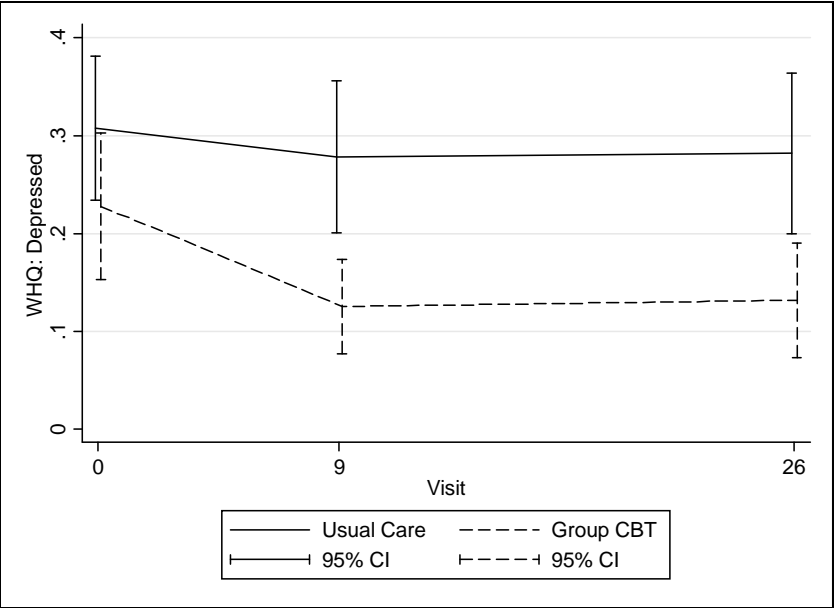

Figure 4: Unadjusted means and confidence intervals for WHQ Sleep problems at baseline, 9 and 26 weeks post-randomisation

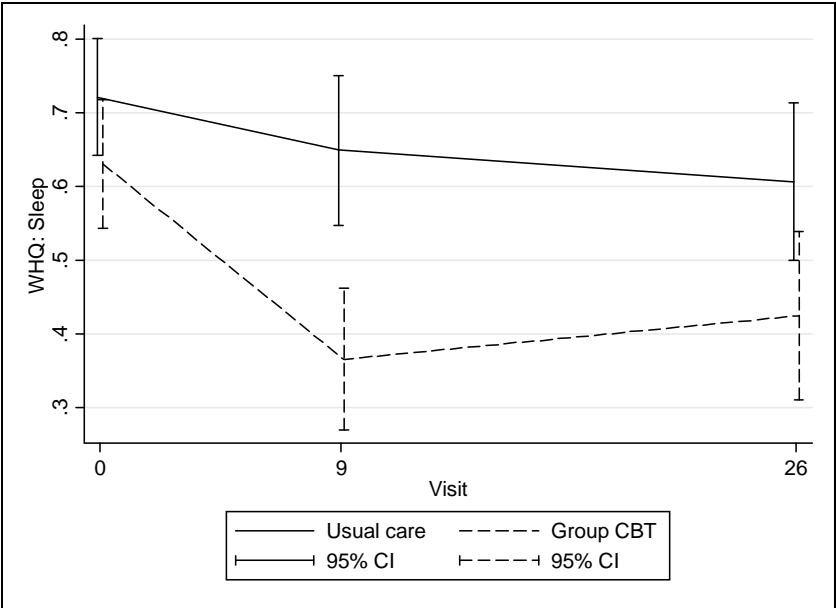

## Quality Assurance for Group CBT intervention

### Independent Session Assessment Session One MENOS 1

Rater .....

Group therapist.....

Date of group.....

| Session aims                                                                                                                         | Comments |
|--------------------------------------------------------------------------------------------------------------------------------------|----------|
| Introduce group members                                                                                                              |          |
| Outline group ground rules                                                                                                           |          |
| Create a supportive group atmosphere in which women are encouraged to participate                                                    |          |
| Provide clear information about the physiology of hot flushes and night sweats? (i.e. thermo-neutral zone)                           |          |
| Provide clear information about the cognitive behavioural model of hot flushes and night sweats?<br>(E.g. Link thoughts to feelings) |          |
| Deliver main message – stress can affect hot flushes                                                                                 |          |
| Provide clear information about role of triggers                                                                                     |          |
| Practice relaxation during the session                                                                                               |          |
| Elicit and respond to questions appropriately                                                                                        |          |
| Outline and encourage homework and give out homework sheets and questionnaires for the next week                                     |          |
| Adopt empathic, positive and supportive therapeutic style                                                                            |          |

**Additional Comments:**

Signed:

Date:

## Quality Assurance for Group CBT intervention

### Independent Session Assessment Session Two MENOS 1

Rater .....

Group therapist.....

Date of group.....

| Session aims                                                                                     | Comments |
|--------------------------------------------------------------------------------------------------|----------|
| Review homework on precipitants                                                                  |          |
| Group discussion of precipitant modification                                                     |          |
| Reminder of role of stress in hot flushes                                                        |          |
| Provide clear information about stress to include fight or flight response and cognitive factors |          |
| Group to consider their own cognitive and behavioural aspects of stress                          |          |
| Deliver information on cognitive interventions for stress                                        |          |
| Deliver information on behavioural interventions for stress                                      |          |
| Group members to generate own stress plan for homework task                                      |          |
| Practice relaxation during the session                                                           |          |
| Elicit and respond to questions appropriately                                                    |          |
| Outline and encourage homework and give out homework sheets and questionnaires for the next week |          |
| Adopt empathic, positive and supportive therapeutic style                                        |          |

**Additional Comments:**

Signed:

Date:

## Quality Assurance for Group CBT intervention

### Independent Session Assessment Session Three MENOS 1

Rater .....

Group therapist.....

Date of group.....

| Session aims                                                                                                        | Comments |
|---------------------------------------------------------------------------------------------------------------------|----------|
| Review homework on precipitants and wellbeing goals                                                                 |          |
| Reminder of 4 factor model and role of thoughts                                                                     |          |
| Provide clear information on nature of thoughts in hot flushes                                                      |          |
| Provide clear information on types of thinking linked to increased distress including social situations and control |          |
| Deliver information on addressing these types of thoughts and provide examples                                      |          |
| Group work to generate alternative cognitive response                                                               |          |
| Provide clear information on behavioural responses to hot flushes                                                   |          |
| Review relaxation and paced breathing                                                                               |          |
| Practice relaxation and paced breathing                                                                             |          |
| Elicit and respond to questions appropriately                                                                       |          |
| Outline and encourage homework and give out homework sheets and questionnaires for the next week                    |          |
| Adopt empathic, positive and supportive therapeutic style                                                           |          |

**Additional Comments:**

Signed:

Date:



## Quality Assurance for Group CBT intervention

### Independent Session Assessment Session Four MENOS 1

Rater .....

Group therapist.....

Date of group.....

| Session aims                                                                                     | Comments |
|--------------------------------------------------------------------------------------------------|----------|
| Review homework on precipitants and wellbeing goals                                              |          |
| Group feedback regarding cognitive work with any difficulties raised and discussed               |          |
| Practice paced breathing as a group                                                              |          |
| Group feedback on sleep diaries                                                                  |          |
| Provide clear information about physiological aspects of sleep                                   |          |
| Provide clear information about factors influencing perception of sleep                          |          |
| Provide information on CBT model of sleep quality and behavioural interventions                  |          |
| Provide clear information about daytime tiredness                                                |          |
| Group discussion to generate sleep goals                                                         |          |
| Elicit and respond to questions appropriately                                                    |          |
| Outline and encourage homework and give out homework sheets and questionnaires for the next week |          |
| Adopt empathic, positive and supportive therapeutic style                                        |          |

**Additional Comments:**

Signed:

Date:

## Quality Assurance for Group CBT intervention

### Independent Session Assessment Session Five MENOS 1

Rater .....

Group therapist.....

Date of group.....

| Session aims                                                                                                                  | Comments |
|-------------------------------------------------------------------------------------------------------------------------------|----------|
| Review homework and progress so far to include cognitive behavioural work for hot flushes and homework from last week (sleep) |          |
| Review paced breathing and address any difficulties                                                                           |          |
| Practice paced breathing as a group                                                                                           |          |
| Provide clear information about cognitive factors affecting sleep                                                             |          |
| Provide clear information about ways to address cognitive factors influencing sleep                                           |          |
| Provide clear information about factors influencing perception of sleep                                                       |          |
| Provide clear information about cognitive behavioural strategies to address worries that cause wakefulness                    |          |
| Provide clear information about managing night sweats                                                                         |          |
| Group discussion to develop sleep goals further                                                                               |          |
| Elicit and respond to questions appropriately                                                                                 |          |
| Outline and encourage homework and give out homework sheets and questionnaires for the next week                              |          |
| Adopt empathic, positive and supportive therapeutic style                                                                     |          |

**Additional Comments:**

Signed:

Date:

## Quality Assurance for Group CBT intervention

### Independent Session Assessment Session Six MENOS 1

Rater .....

Group therapist.....

Date of group.....

| Session aims                                                                                                                                   | Comments |
|------------------------------------------------------------------------------------------------------------------------------------------------|----------|
| Review homework from last week to include cognitive and behavioural sleep strategies and NS management                                         |          |
| Revisit cognitive behavioural model of HF/NS and link to strategies from each session                                                          |          |
| Provide clear rationale for maintenance plan in relation to cognitive behavioural work and relapse prevention                                  |          |
| Deliver information around important considerations for maintenance plan                                                                       |          |
| Group to identify and discuss personal cognitive, behavioural, affective and physical signs of positive change since beginning of intervention |          |
| Group to identify personal barriers to maintaining positive changes that may arise in future                                                   |          |
| Group to identify personal cognitive behavioural, affective and physical signs indicative of a setback                                         |          |
| Group to consider ways to overcome a setback using strategies learned during the intervention                                                  |          |
| Group members to generate and feedback personal maintenance plan using answers generated from discussion                                       |          |
| Elicit and respond to questions appropriately                                                                                                  |          |
| Practice paced breathing as a group                                                                                                            |          |
| Adopt empathic, positive and supportive therapeutic style                                                                                      |          |

**Additional Comments:**

Signed:

Date:
